# Supplementary material for: Beyond pledges: academic journals in high-income countries can do more to decolonise global health
Source: PubMed Central journal article supplement — BMJ Glob Health. 2021 May 24;6(5):e006200. doi: 10.1136/bmjgh-2021-006200 (PMC8149356; doi:10.1136/bmjgh-2021-006200), 2021-05-24
Supplement: bmjgh-2021-006200supp001.pdf [file bmjgh-2021-006200supp001.pdf]

## Appendix 1.

### Nurturing Care Framework (NCF) and Nurturing Care Handbook (NCH): Authors and contributors

#### Pre-NCF publications (2007-2016)

1. **International Child Development Steering Group—LANCET 2007 SERIES**

<https://www.thelancet.com/series/early-child-development-in-developing-countries-2007>

##### **Child development in developing countries 1**

##### **Developmental potential in the first 5 years for children in developing countries**

Sally Grantham-McGregor, Yin Bun Cheung, Santiago Cueto, Paul Glewwe, Linda Richter, Barbara Strupp, and the International Child Development Steering Group†

##### **Child development in developing countries 2**

##### **Child development: risk factors for adverse outcomes in developing countries**

Susan P Walker, Theodore D Wachs, Julie Meeks Gardner, Betsy Lozoff, Gail A Wasserman, Ernesto Pollitt, Julie A Carter, and the International Child Development Steering Group

##### **Child development in developing countries 3**

##### **Strategies to avoid the loss of developmental potential in more than 200 million children in the developing world.**

Patrice L Engle, Maureen M Black, Jere R Behrman, Meena Cabral de Mello, Paul J Gertler, Lydia Kapiriri, Reynaldo Martorell, Mary Eming Young, and the International Child Development Steering Group†

##### **†International Child Development Steering Group**

Sally Grantham-McGregor, Patrice Engle, Maureen Black, Julie Meeks Gardner, Betsy Lozoff, Theodore D Wachs, Susan Walker.

2. **International Child Development Steering Group—LANCET 2011 SERIES**

<https://www.thelancet.com/series/child-development-in-developing-countries-2>

##### **Child Development 1. Inequality in early childhood: risk and protective factors for early child development**

Susan P Walker, Theodore D Wachs, Sally Grantham-McGregor, Maureen M Black, Charles A Nelson, Sandra L Huffman, Helen Baker-Henningham, Susan M Chang, Jena D Hamadani, Betsy Lozoff, Julie M Meeks Gardner, Christine A Powell, Atif Rahman, Linda Richter

##### **Child Development 2. Strategies for reducing inequalities and improving developmental outcomes for young children in low-income and middle-income countries.**

Patrice L Engle, Lia C H Fernald, Harold Alderman, Jere Behrman, Chloe O'Gara, Aisha Yousafzai, Meena Cabral de Mello, Melissa Hidrobo, Nurper Ulkuer, Ilgi Ertem, Selim Iltus, and the Global Child Development Steering Group.

3. **Early Childhood Development Series Steering Committee- LANCET 2016 SERIES**

<https://www.thelancet.com/series/ECD2016>

##### **Advancing Early Childhood Development: from Science to Scale 1**

##### **Early childhood development coming of age: science through the life course.**

Maureen M Black, Susan P Walker, Lia C H Fernald, Christopher T Andersen, Ann M DiGirolamo, Chunling Lu, Dana C McCoy, Günther Fink, Yusra R Shawar, Jeremy Shiffman, Amanda E

Devercelli, Quentin T Wodon, Emily Vargas-Baron, Sally Grantham-McGregor\*, for the Lancet Early Childhood Development Series Steering Committee†

## **Advancing Early Childhood Development: from Science to Scale 2**

### **Nurturing care: promoting early childhood development.**

Pia R Britto, Stephen J Lye, Kerrie Proulx, Aisha K Yousafzai, Stephen G Matthews, Tyler Vaivada, Rafael Perez-Escamilla, Nirmala Rao, Patrick Ip, Lia C H Fernald, Harriet MacMillan, Mark Hanson, Theodore D Wachs, Haogen Yao, Hirokazu Yoshikawa, Adrian Cerezo, James F Leckman, Zulfiqar A Bhutta, and the Early Childhood Development Interventions Review Group, for the Lancet Early Childhood Development Series Steering Committee†

## **Advancing Early Childhood Development: from Science to Scale 3**

### **Investing in the foundation of sustainable development: pathways to scale up for early childhood development.**

Linda M Richter, Bernadette Daelmans, Joan Lombardi, Jody Heymann, Florencia Lopez Boo, Jere R Behrman, Chunling Lu, Jane E Lucas, Rafael Perez-Escamilla, Tarun Dua, Zulfiqar A Bhutta, Karin Stenberg, Paul Gertler, Gary L Darmstadt, with the Paper 3 Working Group and the Lancet Early Childhood Development Series Steering Committee†

#### **Paper 3 Working Group**

RR Bouhouch, Z Cetin, K Chadwick, J Das, A Earle, SKG Jensen, NZ Khan, N Milovantseva, A Ralaidovy, N Rao, A Raub, M-L Samuels, S Segura-Pérez, C Servili, Y Shawar, J Shiffman, M Tomlinson, A Torres, E Vargas-Barón, C Vazquez, H Yoshikawa.

#### **†Early Child Development Series Steering Committee**

Zulfiqar A Bhutta, Maureen M Black, Pia R Britto, Bernadette Daelmans, Gary L Darmstadt, Tarun Dua, Paul Gertler, Jody Heymann, Joan Lombardi, Florencia Lopez Boo, Stephen J Lye, Harriet MacMillan, Rafael Perez-Escamilla, Nirmala Rao, Linda M Richter (chair).

4. **Effective interventions and strategies for improving early child development.** BMJ. 2015 Sep 14;351:h4029. <https://www.bmj.com/content/bmj/351/bmj.h4029.full.pdf>  
Daelmans B, Black MM, Lombardi J, Lucas J, Richter L, Silver K, Britto P, Yoshikawa H, Perez-Escamilla R, MacMillan H, Dua T, Bouhouch RR, Bhutta Z, Darmstadt GL, Rao N; steering committee of a new scientific series on early child development. We thank Mark Tomlinson for a careful review of the draft manuscript.
5. **Global research priorities to accelerate early child development in the sustainable development era.** Lancet Glob Health 2016 Dec;4(12): e887-e889.  
<https://www.thelancet.com/action/showPdf?pii=S2214-109X%2816%2930218-2>  
Tarun Dua, Mark Tomlinson, Elizabeth Tablante, Pia Britto, Aisha Yousfzai, Bernadette Daelmans, Gary L Darmstadt.
6. **Early childhood development: the foundation of sustainable Development** Lancet. 2017 Jan 7;389(10064):9-11. <https://www.thelancet.com/action/showPdf?pii=S0140-6736%2816%2931659-2>  
Bernadette Daelmans, Gary L Darmstadt, Joan Lombardi, Maureen M Black, Pia R Britto, Stephen Lye, Tarun Dua, Zulfiqar A Bhutta, Linda M Richter, on behalf of the Lancet Early Childhood Development Series Steering Committee.
7. **Risk of poor development in young children in low-income and middle-income countries: an estimation and analysis at the global, regional, and country level.** Lancet Glob Health. 2016 Dec;4(12):e916-e922. <https://www.thelancet.com/action/showPdf?pii=S2214-109X%2816%2930266-2>  
Lu C, Black MM, Richter LM.

## **Nurturing Care Framework (NCF) 2018**

<http://apps.who.int/iris/bitstream/handle/10665/272603/9789241514064-eng.pdf?ua=1>

### **Management team:**

Raoul Bermejo, UNICEF; Pia Britto (co-chair), UNICEF; Olive Cocoman (acting project coordinator), PMNCH, Bernadette Daelmans (chair), WHO; Tarun Dua, WHO (co-chair); Leslie Elder, Global Financing Facility supported by the WBG; Matthew Frey, PATH; Dan Irvine, World Vision International; Sheila Manji (project coordinator), PMNCH; Lori McDougall, PMNCH; Sara Poehlman, Save the Children; Linda Richter, University of the Witwatersrand – DST-NRF Centre of Excellence in Human Development; Marta Seoane Aguilo, WHO; Mark Tomlinson, Stellenbosch University, Institute for Child and Adolescent Health Research; Shekufeh Zonji, ECDAN; Mark Young, UNICEF.

### **Advisory committee:**

Lisa Bohmer, Conrad N. Hilton Foundation; Betzabe Butron Riveras, Pan American Health Organization; Amanda Devercelli, WBG; Cyril Engmann, PATH; Ilgi Ertem, Ankara University; Jane Fisher, Monash University; Liana Ghent, International Step by Step Association; Esther Goh, Bernard van Leer Foundation; Nelson Gomonda, Sanitation and Water for All; Deepa Grover, UNICEF; Rob Hughes, The Children's Investment Fund Foundation; Ghassan Issa, Arab Network for Early Childhood Care and Development; Patricia Jodrey, USAID; Romilla Karnati, Save the Children; Melissa Kelly, Asia-Pacific Regional Network for Early Childhood; Betty Kirkwood, London School of Hygiene & Tropical Medicine; Sarah Klaus, Open Society Foundations; Vibha Krishnamurthy, Ummeed Child Development Center; Vesna Kutlesic, Eunice Kennedy Shriver National Institute of Child Health and Human Development; Joan Lombardi, Bernard van Leer Foundation; Florencia López Bóo, Banco Interamericano de Desarrollo; Jane Lucas; Stephen Lye, Alliance for Human Development, University of Toronto; Kofi Marfo, Aga Khan University Institute for Human Development; Dominique McMahon, Grand Challenges Canada / Grands Défis Canada; Mohamad Mikati, Duke University Medical Center; Katie Murphy, International Rescue Committee; Asifa Nurani, Blue Ocean Consulting Limited; Frank Oberklaid, The Royal Children's Hospital – Melbourne and Murdoch Children's Research Institute; Lynette Okengo, Africa Early Childhood Network; Nosa Orobato, Bill & Melinda Gates Foundation; Rafael PerezEscamilla, Yale University; Manfred Pretis, Medical School Hamburg; Laura Rawlings, World Bank Group; Sweta Shah, Aga Khan Foundation; Manpreet Singh, Bill & Melinda Gates Foundation; Kate Somers, Bill & Melinda Gates Foundation; Giorgio Tamburlini, Centro per la Salute del Bambino Onlus; Valerie Unite, Childhood & Early Parenting Principles; Susan Walker, University of Melbourne; Donald Wertlieb, Tufts University; Hiro Yoshikawa, New York University, Steinhardt; Aisha Yousafzai, Harvard T.H. Chan School of Public Health.

### **Acknowledgements:**

*We express our appreciation for the 1 000 contributions from dedicated stakeholders in 111 countries for their valuable feedback on the Nurturing Care Framework. Contributions were received from across a range of sectors, including health, education, nutrition, WASH, environmental health, and social and child protection. A complete list of organizations that participated in the consultation process is available at [www.nurturing-care.org](http://www.nurturing-care.org).*

## Post-NCF Publications (2018 to date)

8. **G20's Initiative for Early Childhood Development.** Lancet 2018 Dec 22 -Jan 4 2019;392(10165):2695-2696. <https://www.thelancet.com/action/showPdf?pii=S0140-6736%2818%2933058-7>  
Linda M Richter, Chris Desmond, Jere Behrman, Pia Britto, Bernadette Daelmans, Amanda E Devercelli, Paul Gertler, John Hoddinott, Wafaie Fawzi, Günther Fink, Joan Lombardi, Florencia Lopez Boo, Chunling Lu, Stephen Lye, Milagros Nores, Aisha Yousafzai
9. **Early childhood development: an imperative for action and measurement at scale.** BMJ Glob Health. 2019 Jun 24;4(Suppl 4):e001302. [https://gh.bmj.com/content/bmjgh/4/Suppl\\_4/e001302.full.pdf](https://gh.bmj.com/content/bmjgh/4/Suppl_4/e001302.full.pdf)  
Richter L, Black M, Britto P, Daelmans B, Desmond C, Devercelli A, Dua T, Fink G, Heymann J, Lombardi J, Lu C, Naicker S, Vargas-Barón E.
10. **Global research priorities to accelerate programming to improve early childhood development in the sustainable development era: a CHNRI exercise.** J Glob Health. 2019 Dec;9(3):020703. <http://jogh.org/documents/issue201902/jogh-09-020703.pdf>  
Tomlinson M, Darmstadt GL, Yousafzai AK, Daelmans B, Britto P, Gordon SL, Tablante E, Dua T.
11. **Scaling early child development: what are the barriers and enablers?** Arch Dis Child. 2019 Apr;104(Suppl 1):S43-S50. [https://adc.bmj.com/content/archdischild/104/Suppl\\_1/S43.full.pdf](https://adc.bmj.com/content/archdischild/104/Suppl_1/S43.full.pdf)  
Cavallera V, Tomlinson M, Radner J, Coetzee B, Daelmans B, Hughes R, Pérez-Escamilla R, Silver KL, Dua T.
12. **Inequalities in early childhood care and development in low/middle-income countries: 2010-2018.** BMJ Glob Health. 2020 Feb 4;5(2):e002314. <https://gh.bmj.com/content/bmjgh/5/2/e002314.full.pdf>  
Lu C, Cuartas J, Fink G, McCoy D, Liu K, Li Z, Daelmans B, Richter L.
13. **Data for action on early childhood development**  
Lancet 2020 Dec 5;396(10265):1784-1786. <https://www.thelancet.com/action/showPdf?pii=S0140-6736%2820%2932482-X>  
Linda M Richter, Claudia Cappa, Ghassan Issa, Chunling Lu, Nicole Petrowski, Sara N Naicker.
14. **Optimising child and adolescent health and development through an integrated ecological life course approach.** BMJ. 2021 Mar 17;372:m4784. <https://www.bmj.com/content/bmj/372/bmj.m4784.full.pdf>  
Tomlinson M, Hunt X, Daelmans B, Rollins N, Ross D, Oberklaid F.
15. **The principles of Nurturing Care promote human capital and mitigate adversities from preconception through adolescence.** BMJ Glob Health. 2021 Apr;6(4):e004436. <https://gh.bmj.com/content/bmjgh/6/4/e004436.full.pdf>  
Black MM, Behrman JR, Daelmans B, Prado EL, Richter L, Tomlinson M, Trude ACB, Wertlieb D, Wuerml AJ, Yoshikawa H.

## **Draft Nurturing Care Handbook (NCH) 2021**

[https://nurturing-care.org/wp-content/uploads/2021/01/Nurturing\\_Care\\_Handbook\\_01.pdf](https://nurturing-care.org/wp-content/uploads/2021/01/Nurturing_Care_Handbook_01.pdf)

### **Writing team:**

Bernadette Daelmans, WHO; Kelly Gemmell, Institute for Life Course Health Research, Stellenbosch University; Sheila Manji, PMNCH; Bettina Schwethelm, consultant; Mark Tomlinson, Institute for Life Course Health Research, Stellenbosch University.

### **Content sections were provided by:**

Betzabe Butron Riveros, WHO; Kate Doyle, Promundo; Ilgi Ertem, Ankara University; Jane Fisher, Monash University; Svetlana Drivdale, PATH; Matthew Frey, PATH; Liana Ghent, International Step by Step Association; Margaret Greene, Promundo; Patrick Hoffmann, Human Safety Net; Robert Hughes, London School of Hygiene and Tropical Medicine; Dan Irvine, World Vision; Romilla Karnati, Save the Children; Vibha Krishnamurthy, Ummeed Child Development Center; Joan Lombardi, Early Opportunities; Rajesh Mehta, WHO; Ana Nieto, UNICEF; Katie Murphy, International Rescue Committee; Frank Oberklaid, The Royal Children's Hospital Melbourne and the Murdoch Children's Research Institute; Rafael Perez-Escamilla, Yale University; Linda Richter, University of the Witwatersrand; Sofia Segura-Pérez, Hispanic Health Council; Sweta Shah, Aga Khan Foundation; Kate Strong, WHO; Melanie Swan, Plan International; Zorica Trikić, International Step by Step Association; Francesca Vezzini, Human Safety Net; Cathryn Wood, Development Media International.

### **Additional contributions were made by:**

Jamela Al-raiby, WHO; Judi Aubel, Grandmother Project; Frances Mary Beaton-Day, World Bank; Claudia Cappa, UNICEF; Vanessa Cavallera, WHO; Terrell Carter, American Academy of Pediatrics; Elga Filipa De Castro, UNICEF; Lucie Cluver, University of Oxford; Tom Davis, World Vision; Teshome Desta, WHO; Anne Detjen, UNICEF; Amanda Devercelli, World Bank; Tarun Dua, WHO; Leslie Elder, World Bank; Maya Elliott, UNICEF; Ghassan Issa, Arab Network for Early Childhood Development; Aleksandra Jovic, UNICEF; Masahiro Kato, UNICEF; Jamie Lachman, University of Oxford; Christina Laurenzi, Institute for Life Course Health Research, Stellenbosch University; Jane Lucas; Susanne Martin Herz, American Academy of Pediatrics; Colleen Murray, UNICEF; Daniel Page, Institute for Life Course Health Research, Stellenbosch University; Kiran Patel, American Academy of Pediatrics; Janna Patterson, American Academy of Pediatrics; Nicole Petrowski, UNICEF; Annie Portela, WHO; Chemba Raghavan, UNICEF; Nigel Rollins, WHO; Chiara Servili, WHO; Megan Song McHenry, American Academy of Pediatrics; Giorgio Tamburlini, Centro per la Salute del Bambino Onlus; Shekufeh Zonji, ECDAN.

**Access date for all publications: 29 April 2021**
